# Supplementary material
Source: PubMed Central journal article supplement (PMC6647028)
Supplement: NIHMS1013787-supplement-Supplemental_Data__Table_S1_.pdf [file NIHMS1013787-supplement-Supplemental_Data__Table_S1_.pdf]

**Table S1.** Patient clinical data. All patients had a diagnosis of pancreatic ductal carcinoma except patient 9 (ampullary cancer). Data was current at the time of press and is provided to the extent it was available in the patient medical records. Sex, Male (M) or Female (F); Age, current age at the time of surgery; Stage, American Joint Committee on Cancer Staging (AJCC) stage at the time of surgery, as determined by pathological review; Organoid, origin of organoids was either from PDX or patient primary tumor; 2D, yes or no refers to if two-dimensional cell lines were created; Neoadjuvant therapy (neoadj.), name of therapy indicated, if given; Adjuvant therapy (adj.), name of therapy indicated; Tumor size, dimensions of tumor, as determined by computed tomography scan, either before surgery (pre-surgery) or during the course of therapy indicated; CA19-9, Carbohydrate Antigen 19-9 levels measured in the blood in U/ml; Survival, months following surgery the patient survived; Notes, any information given in the medical record that indicated how the patient responded to treatment, or their current disease state. *Treatment abbreviations:* FOLFIRINOX, combination therapy of folinic acid, fluorouracil, irinotecan, and oxaliplatin; FOLFOX4, combination therapy of folinic acid, fluorouracil, and oxaliplatin; Gemcitabine, Gem; Abiraterone, Abx; Radiation Therapy, RT. Capecitabine, Cap; Surgery, surg.

| Study ID | Sex | Age | Stage | Organoids | 2D  | Neoadjuvant Therapy | Adjuvant Therapy                                    | Tumor size                                                                     | CA19-9                                                                                             | Survival (post-surgery, months) | Notes                                                                                                                        |
|----------|-----|-----|-------|-----------|-----|---------------------|-----------------------------------------------------|--------------------------------------------------------------------------------|----------------------------------------------------------------------------------------------------|---------------------------------|------------------------------------------------------------------------------------------------------------------------------|
| 1        | F   | 65  | IIB   | PDX       | Yes | None                | Gemcitabine;<br>FOLFIRINOX                          | Tumor size not on file                                                         | 20, pre-surg.;<br>14.47, with mets                                                                 | 16                              | Developed mets on Gemcitabine. Initial response to FOLFIRINOX, then became resistant.                                        |
| 2        | M   | 57  | IIB   | PDX       | Yes | FOLFIRINOX          | FOLFIRINOX (no irinotecan);<br>Gemcitabine/Abraxane | 4.6x3.2cm, prior to neoadj. FOLFIRINOX;<br>3.3x2.9cm, after neoadj. FOLFIRINOX | 2286, pre-surg.;<br>46.64, post-surg.;<br>876, 5m post-surg.;<br>32475, 1m prior to death          | 16                              | Minimal response to neoadj. FOLFIRINOX. Developed mets on adj. FOLFIRINOX. Response to GEM/Abx unclear as it was given late. |
| 3        | M   | 58  | IA    | PDX       | Yes | None                | Gemcitabine                                         | Tumor size not on file                                                         | No CA-19-9 on file                                                                                 | Alive                           | No evidence of disease.                                                                                                      |
| 4        | F   | 66  | IIB   | PDX       | Yes | None                | Gemcitabine;<br>Gemcitabine/<br>Oxaliplatin         | Tumor size not on file                                                         | No CA19-9 on file                                                                                  | 16                              | Disease advanced when adj. chemo started. Died on second round of chemo.                                                     |
| 5        | M   | 50  | IIB   | PDX       | No  | None                | Gemcitabine                                         | 4cm, pre-surgery                                                               | 21, 3m post-surg.;<br>53, following Gem                                                            | 15                              | CA19-9 rose while patient was on Gem.                                                                                        |
| 6        | M   | 50  | IIB   | Primary   | No  | None                | Gemcitabine;<br>Gemcitabine/Abraxane                | 3.4x2.0cm and 1.5, pre-surgery.                                                | 766, pre-surg.;<br>1954, 1m prior to death                                                         | 15                              | No response to Gem/Abx, developed liver mets.                                                                                |
| 7        | M   | 62  | IIB   | Primary   | No  | FOLFIRINOX          | Gemcitabine;<br>Gemcitabine/Abraxane                | 2.5x2.4cm, pre-surgery                                                         | 58, following Gem/Abx                                                                              | 11                              | Liver mets developed on Gem. No response to FOLFIRINOX, No response to Gem/Abx.                                              |
| 8        | M   | 61  | IIB   | Primary   | No  | FOLFIRINOX          | FOLFIRINOX; RT                                      | 25x22mm, prior to neoadj. FOLFIRINOX;<br>5mm, after neoadj. FOLFIRINOX         | 33.12, pre-surg.;<br>25, pre-surg.;<br>9, post-surg.;<br>15, post-adj Rx, pre-RT;<br>63, during RT | Alive                           | No evidence of disease.                                                                                                      |

|    |   |    |     |         |    |      |                                                              |                        |                                                                      |       |                                                     |
|----|---|----|-----|---------|----|------|--------------------------------------------------------------|------------------------|----------------------------------------------------------------------|-------|-----------------------------------------------------|
| 9  | M | 71 | IB  | Primary | No | None | FOLFOX4                                                      | 2.5x2.1cm, pre-surgery | 17, post- adj.                                                       | Alive | Ampullary cancer diagnosis. No evidence of disease. |
| 10 | M | 66 | IIB | Primary | No | None | Gemcitabine;<br>Gemcitabine/<br>Capecitabine;<br>Gemcitabine | 1.5cm, pre-surgery     | 99, pre-surg.;<br>13, post-surg.;<br>30, pre-adj.;<br>12, on GEM/Cap | Alive | No evidence of disease.                             |
